# Supplementary material
Source: PubMed Central journal article supplement (PMC4506347)
Supplement: eye201570x1.pdf [file eye201570x1.pdf]

## APPENDIX

### 3.1 Cataract Audit – Patient “TyPE Questionnaire”

Please answer these questions based on your best vision with both eyes open and wearing glasses or contact lenses if you usually do.

1. How would you rate your vision? (how well do you see?). Please circle one number

|           |   |
|-----------|---|
| Poor      | 1 |
| Fair      | 2 |
| Good      | 3 |
| Very Good | 4 |
| Excellent | 5 |

2. How much does your vision hinder, limit, or disable you in each of the following activities? Please circle one number on each line

| <i>Activity</i>                                 | <i>Not at All</i> | <i>A little bit</i> | <i>Some</i> | <i>Quite a lot</i> | <i>Totally disabled</i> | <i>Don't do for other reasons</i> |
|-------------------------------------------------|-------------------|---------------------|-------------|--------------------|-------------------------|-----------------------------------|
| Your usual daily activities                     | 1                 | 2                   | 3           | 4                  | 5                       | 0                                 |
| Recognising people or objects across the street | 1                 | 2                   | 3           | 4                  | 5                       | 0                                 |
| Reading price labels in shops or supermarkets   | 1                 | 2                   | 3           | 4                  | 5                       | 0                                 |
| Reading a magazine, newspaper or book           | 1                 | 2                   | 3           | 4                  | 5                       | 0                                 |
| Knitting or sewing                              | 1                 | 2                   | 3           | 4                  | 5                       | 0                                 |
| Watching television                             | 1                 | 2                   | 3           | 4                  | 5                       | 0                                 |
| Daytime driving                                 | 1                 | 2                   | 3           | 4                  | 5                       | 0                                 |
| Night-time driving                              | 1                 | 2                   | 3           | 4                  | 5                       | 0                                 |

**3. How much are you hindered, limited, or disabled by glare (dazzling light) in each of the following activities?**

*Please circle one number on each line*

| <i>Activity</i>                                | <i>Not at All</i> | <i>A little bit</i> | <i>Some</i> | <i>Quite a lot</i> | <i>Totally disabled</i> | <i>Don't do for other reasons</i> |
|------------------------------------------------|-------------------|---------------------|-------------|--------------------|-------------------------|-----------------------------------|
| Your usual daily activities                    | 1                 | 2                   | 3           | 4                  | 5                       | 0                                 |
| Reading shiny paper (such as a magazine)       | 1                 | 2                   | 3           | 4                  | 5                       | 0                                 |
| Driving towards the sun or oncoming headlights | 1                 | 2                   | 3           | 4                  | 5                       | 0                                 |
| Walking outside on a sunny day                 | 1                 | 2                   | 3           | 4                  | 5                       | 0                                 |

**4. Who filled in this form? Please circle one number**

|                                                        |   |
|--------------------------------------------------------|---|
| I filled it out with no help                           | 1 |
| I filled it out with help with from family and friends | 2 |
| I filled it out with help from a nurse or doctor       | 3 |
| Family and friends filled it out                       | 4 |
| A nurse or doctor filled it out                        | 5 |

**5. Have you had a recent illness, injury, or emotional upset that has affected how you answer these questions?**

|     |   |
|-----|---|
| Yes | 1 |
| No  | 2 |

-----  
**POST-OPERATION/AFTER-OPERATION ONLY**  
 -----

**6. How satisfied are you after your surgery. Please circle one number**

|                |   |                  |   |                     |   |                   |   |
|----------------|---|------------------|---|---------------------|---|-------------------|---|
| Very Satisfied | 1 | Fairly Satisfied | 2 | Rather Dissatisfied | 3 | Very Dissatisfied | 4 |
|----------------|---|------------------|---|---------------------|---|-------------------|---|
